# Supplementary material for: Restoring lepidopteran diversity in a tropical dry forest: relative importance of restoration treatment, tree identity and predator pressure
Source: PeerJ. 2017 May 24;5:e3344. doi: 10.7717/peerj.3344 (PMC5445945; doi:10.7717/peerj.3344)
Supplement: Supplemental Information 1 [file peerj-05-3344-s001.xlsx]

## Sheet: B.D % HERB
ESPECIE	#	SITIO	TRATAMIENTO	%HERBIVORÍA
BARCINO	61	1	AP5	7.1204
BARCINO	82	1	AP5	9.53246
BARCINO	100	1	AP5	7.6215
BARCINO	109	1	AP5	9.68432
BARCINO	82	1	CHP5	6.59745
BARCINO	100	1	CHP5	6.99173
BARCINO	109	1	CHP5	4.60553
BARCINO	91	1	CHP5	1.33028
BARCINO	82	1	SMP2	9.64458
BARCINO	91	1	SMP2	8.7474
BARCINO	100	1	SMP2	18.4169
BARCINO	109	1	SMP2	2.21318
BARCINO	91	2	AP5	17.8773
BARCINO	109	2	AP5	7.31941
BARCINO	100	2	AP5	7.45566
BARCINO	82	2	AP5	11.5259
BARCINO	82	2	CHP6	7.45932
BARCINO	91	2	CHP6	6.49887
BARCINO	109	2	CHP6	2.91607
BARCINO	100	2	CHP6	6.49887
BARCINO	82	2	SMP6	6.81279
BARCINO	91	2	SMP6	17.2626
BARCINO	100	2	SMP6	16.0702
BARCINO	109	2	SMP6	4.34984
BARCINO	34	3	AP4	6.82015
BARCINO	43	3	AP4	8.63695
BARCINO	91	3	AP4	13.173
BARCINO	109	3	AP4	16.2324
BARCINO	34	3	CHP1	13.5236
BARCINO	43	3	CHP1	6.01549
BARCINO	82	3	CHP1	9.55506
BARCINO	4	3	CHP1	8.7474
BARCINO	4	3	SMP1	15.3908
BARCINO	34	3	SMP1	15.209
BARCINO	43	3	SMP1	26.8124
BARCINO	61	3	SMP1	11.161
				9.88416
BOTONCILLO	74	1	AP5	7.27442
BOTONCILLO	95	1	AP5	4.7374
BOTONCILLO	65	1	AP5	5.14468
BOTONCILLO	113	1	AP5	5.14468
BOTONCILLO	26	1	CHP5	15.8029
BOTONCILLO	113	1	CHP5	1.03894
BOTONCILLO	104	1	CHP5	20.5073
BOTONCILLO	56	1	CHP5	4.0254
BOTONCILLO	56	1	SMP2	7.84122
BOTONCILLO	104	1	SMP2	11.222
BOTONCILLO	74	1	SMP2	7.14021
BOTONCILLO	65	1	SMP2	7.11021
BOTONCILLO	56	2	AP5	3.81077
BOTONCILLO	65	2	AP5	4.11677
BOTONCILLO	95	2	AP5	9.38299
BOTONCILLO	113	2	AP5	4.41007
BOTONCILLO	74	2	CHP6	8.57779
BOTONCILLO	95	2	CHP6	8.33969
BOTONCILLO	104	2	CHP6	19.1065
BOTONCILLO	65	2	CHP6	19.1065
BOTONCILLO	65	2	SMP6	12.376
BOTONCILLO	104	2	SMP6	3.80076
BOTONCILLO	113	2	SMP6	4.79084
BOTONCILLO	74	2	SMP6	4.79084
BOTONCILLO	8	3	AP4	16.6308
BOTONCILLO	17	3	AP4	7.00455
BOTONCILLO	74	3	AP4	9.09619
BOTONCILLO	95	3	AP4	9.09619
BOTONCILLO	65	3	CHP1	9.22619
BOTONCILLO	8	3	CHP1	9.09729
BOTONCILLO	95	3	CHP1	4.64941
BOTONCILLO	74	3	CHP1	14.509
BOTONCILLO	8	3	SMP1	35.2939
BOTONCILLO	47	3	SMP1	10.6772
BOTONCILLO	74	3	SMP1	9.86347
BOTONCILLO	17	3	SMP1	17.2482
				9.77753
GUACIMA	45	1	AP5	1.79227
GUACIMA	102	1	AP5	15.6256
GUACIMA	93	1	AP5	1.40567
GUACIMA	111	1	AP5	19.4099
GUACIMA	6	2	AP5	9.65582
GUACIMA	36	2	AP5	4.06536
GUACIMA	63	2	AP5	6.35928
GUACIMA	93	2	AP5	15.0858
GUACIMA	36	3	AP4	7.34293
GUACIMA	63	3	AP4	16.2684
GUACIMA	111	3	AP4	25.931
GUACIMA	93	3	AP4	25.391
GUACIMA	84	1	CHP5	13.9835
GUACIMA	102	1	CHP5	14.3494
GUACIMA	111	1	CHP5	13.9835
GUACIMA	93	1	CHP5	7.98349
GUACIMA	84	2	CHP6	8.44216
GUACIMA	93	2	CHP6	5.57271
GUACIMA	102	2	CHP6	4.75852
GUACIMA	111	2	CHP6	3.95307
GUACIMA	45	3	CHP1	3.57289
GUACIMA	36	3	CHP1	15.7199
GUACIMA	6	3	CHP1	8.0572
GUACIMA	84	3	CHP1	11.0762
GUACIMA	84	1	SMP2	3.86028
GUACIMA	102	1	SMP2	13.3886
GUACIMA	111	1	SMP2	13.3226
GUACIMA	93	1	SMP2	18.282
GUACIMA	63	2	SMP6	17.0815
GUACIMA	93	2	SMP6	14.2275
GUACIMA	102	2	SMP6	3.10401
GUACIMA	111	2	SMP6	5.03414
GUACIMA	36	3	SMP1	86.145
GUACIMA	45	3	SMP1	10.6819
GUACIMA	15	3	SMP1	8.93498
GUACIMA	6	3	SMP1	8.56498
				12.8448
MAJAHUA	37	1	AP5	6.94834
MAJAHUA	115	1	AP5	2.75135
MAJAHUA	106	1	AP5	5.9569
MAJAHUA	67	1	AP5	9.31496
MAJAHUA	76	2	AP5	14.4362
MAJAHUA	115	2	AP5	8.66788
MAJAHUA	85	2	AP5	23.7655
MAJAHUA	19	2	AP5	6.85443
MAJAHUA	19	3	AP4	21.5198
MAJAHUA	106	3	AP4	8.0516
MAJAHUA	58	3	AP4	10.0773
MAJAHUA	76	3	AP4	25.8618
MAJAHUA	19	1	CHP5	2.00831
MAJAHUA	106	1	CHP5	12.5875
MAJAHUA	76	1	CHP5	1.80428
MAJAHUA		1	CHP5	1.80428
MAJAHUA	37	2	CHP6	23.4027
MAJAHUA	76	2	CHP6	7.66269
MAJAHUA	85	2	CHP6	10.9415
MAJAHUA	106	2	CHP6	12.7081
MAJAHUA	19	3	CHP1	15.5303
MAJAHUA	10	3	CHP1	5.53022
MAJAHUA	37	3	CHP1	15.9603
MAJAHUA	58	3	CHP1	10.4266
MAJAHUA	58	1	SMP2	3.10184
MAJAHUA	76	1	SMP2	5.91257
MAJAHUA	85	1	SMP2	4.82735
MAJAHUA	28	1	SMP2	43.3395
MAJAHUA	115	2	SMP6	8.44722
MAJAHUA	76	2	SMP6	8.12722
MAJAHUA	106	2	SMP6	9.95703
MAJAHUA	85	2	SMP6	9.01703
MAJAHUA	10	3	SMP1	1.99264
MAJAHUA	19	3	SMP1	3.35025
MAJAHUA	37	3	SMP1	2.20822
MAJAHUA	115	3	SMP1	12.9906
				10.4957
CORAL	49	3	AP4	10.2134
CORAL	118	3	AP4	10.2062
CORAL	22	3	AP4	13.2062
CORAL	31	3	AP4	10.4961
CORAL	70	1	AP5	6.02057
CORAL	49	1	AP5	3.9353
CORAL	88	1	AP5	8.81998
CORAL	97	1	AP5	9.95211
CORAL	88	2	AP5	10.7539
CORAL	97	2	AP5	8.94042
CORAL	118	2	AP5	7.57657
CORAL	70	2	AP5	4.65711
CORAL	31	3	CHP1	4.85795
CORAL	49	3	CHP1	16.9657
CORAL	90	3	CHP1	3.58782
CORAL	22	3	CHP1	3.78157
CORAL	88	1	CHP5	8.09299
CORAL	97	1	CHP5	8.11963
CORAL	79	1	CHP5	6.11982
CORAL	118	1	CHP5	8.11963
CORAL	88	2	CHP6	8.56273
CORAL	97	2	CHP6	8.01065
CORAL	118	2	CHP6	3.33654
CORAL	79	2	CHP6	7.78654
CORAL	40	3	SMP1	3.04088
CORAL	118	3	SMP1	6.61899
CORAL	22	3	SMP1	6.8991
CORAL	31	3	SMP1	5.61679
CORAL	70	1	SMP2	7.8991
CORAL	97	1	SMP2	5.418
CORAL	88	1	SMP2	8.8991
CORAL	79	1	SMP2	8.9619
CORAL	79	2	SMP6	6.31254
CORAL	88	2	SMP6	11.2974
CORAL	97	2	SMP6	10.9613
CORAL	118	2	SMP6	7.31378
				7.81551
CAHUANANCE	69	1	AP5	3.56085
CAHUANANCE	108	1	AP5	11.4023
CAHUANANCE	117	1	AP5	13.638
CAHUANANCE	87	1	AP5	15.479
CAHUANANCE	117	2	AP5	17.7398
CAHUANANCE	39	2	AP5	34.3726
CAHUANANCE	87	2	AP5	7.23322
CAHUANANCE	108	2	AP5	22.2217
CAHUANANCE	117	3	AP4	18.9153
CAHUANANCE	108	3	AP4	12.3204
CAHUANANCE	87	3	AP4	15.387
CAHUANANCE	12	3	AP4	5.21246
CAHUANANCE	60	1	CHP5	1.81215
CAHUANANCE	69	1	CHP5	5.73086
CAHUANANCE	117	1	CHP5	27.2195
CAHUANANCE	87	1	CHP5	7.00238
CAHUANANCE	39	2	CHP6	18.546
CAHUANANCE	87	2	CHP6	3.52192
CAHUANANCE	78	2	CHP6	16.1009
CAHUANANCE	117	2	CHP6	3.29981
CAHUANANCE	21	3	CHP1	7.69733
CAHUANANCE	12	3	CHP1	50.7002
CAHUANANCE	60	3	CHP1	14.0379
CAHUANANCE	69	3	CHP1	6.8816
CAHUANANCE	39	1	SMP2	6.00873
CAHUANANCE	78	1	SMP2	6.22107
CAHUANANCE	60	1	SMP2	6.19901
CAHUANANCE	69	1	SMP2	4.10087
CAHUANANCE	87	2	SMP6	7.69935
CAHUANANCE	78	2	SMP6	13.2275
CAHUANANCE	117	2	SMP6	13.8471
CAHUANANCE	108	2	SMP6	6.65311
CAHUANANCE	21	3	SMP1	4.31311
CAHUANANCE	12	3	SMP1	23.1131
CAHUANANCE	30	3	SMP1	12.1152
CAHUANANCE	78	3	SMP1	13.9011
				12.7065
LLORASANGRE	94	1	AP5	3.38776
LLORASANGRE	55	1	AP5	2.53252
LLORASANGRE	112	1	AP5	2.07588
LLORASANGRE	73	1	AP5	3.66265
LLORASANGRE	112	1	CHP5	1.56894
LLORASANGRE	103	1	CHP5	0.128201
LLORASANGRE	73	2	CHP5	0.869581
LLORASANGRE	94	1	CHP5	0.0102023
LLORASANGRE	73	1	SMP2	0.94483
LLORASANGRE	103	1	SMP2	4.4624
LLORASANGRE	94	1	SMP2	0.102023
LLORASANGRE	112	1	SMP2	3.21485
LLORASANGRE	94	2	AP5	1.2453
LLORASANGRE	112	2	AP5	0.36761
LLORASANGRE	55	2	AP5	2.66799
LLORASANGRE	64	2	AP5	4.19273
LLORASANGRE	73	2	CHP6	2.16049
LLORASANGRE	112	2	CHP6	2.12647
LLORASANGRE	94	2	CHP6	2.16049
LLORASANGRE	64	2	CHP6	2.9299
LLORASANGRE	73	2	SMP6	1.12692
LLORASANGRE	94	2	SMP6	3.63506
LLORASANGRE	112	2	SMP6	1.2453
LLORASANGRE	103	2	SMP6	0.36761
LLORASANGRE	103	3	AP4	2.66799
LLORASANGRE	46	3	AP4	4.19273
LLORASANGRE	94	3	AP4	2.12647
LLORASANGRE	64	3	AP4	3.8432
LLORASANGRE	7	3	CHP1	4.93897
LLORASANGRE	64	3	CHP1	0.696847
LLORASANGRE	94	3	CHP1	0.586035
LLORASANGRE	46	3	CHP1	3.56147
LLORASANGRE	7	3	SMP1	0.184529
LLORASANGRE	16	3	SMP1	2.77159
LLORASANGRE	25	3	SMP1	0.0718687
LLORASANGRE	46	3	SMP1	0.374589
				2.03339

## Sheet: B.D % HERB ESPECIES
ESPECIE	#	SITIO	TRATAMIENTO	%HERBIVORÍA	DESV. EST.		ESPECIE	#	SITIO	TRATAMIENTO	%HERBIVORÍA			ESPECIE	#	SITIO	TRATAMIENTO	%HERBIVORÍA
BARCINO	61	1	AP5	7.1204			BOTONCILLO	74	1	AP5	7.27442			GUACIMA	45	1	AP5	1.79227
BARCINO	82	1	AP5	9.53246			BOTONCILLO	95	1	AP5	4.7374			GUACIMA	102	1	AP5	15.6256
BARCINO	100	1	AP5	7.6215			BOTONCILLO	65	1	AP5	5.14468			GUACIMA	93	1	AP5	1.40567
BARCINO	109	1	AP5	9.68432			BOTONCILLO	113	1	AP5	5.14468			GUACIMA	111	1	AP5	19.4099
BARCINO	82	1	CHP5	6.59745			BOTONCILLO	26	1	CHP5	15.8029			GUACIMA	6	2	AP5	9.65582
BARCINO	100	1	CHP5	6.99173			BOTONCILLO	113	1	CHP5	1.03894			GUACIMA	36	2	AP5	4.06536
BARCINO	109	1	CHP5	4.60553			BOTONCILLO	104	1	CHP5	20.5073			GUACIMA	63	2	AP5	6.35928
BARCINO	91	1	CHP5	1.33028			BOTONCILLO	56	1	CHP5	4.0254			GUACIMA	93	2	AP5	15.0858
BARCINO	82	1	SMP2	9.64458			BOTONCILLO	56	1	SMP2	7.84122			GUACIMA	36	3	AP4	7.34293
BARCINO	91	1	SMP2	8.7474			BOTONCILLO	104	1	SMP2	11.222			GUACIMA	63	3	AP4	16.2684
BARCINO	100	1	SMP2	18.4169			BOTONCILLO	74	1	SMP2	7.14021			GUACIMA	111	3	AP4	25.931
BARCINO	109	1	SMP2	2.21318			BOTONCILLO	65	1	SMP2	7.11021			GUACIMA	93	3	AP4	25.391
BARCINO	91	2	AP5	17.8773			BOTONCILLO	56	2	AP5	3.81077			GUACIMA	84	1	CHP5	13.9835
BARCINO	109	2	AP5	7.31941			BOTONCILLO	65	2	AP5	4.11677			GUACIMA	102	1	CHP5	14.3494
BARCINO	100	2	AP5	7.45566			BOTONCILLO	95	2	AP5	9.38299			GUACIMA	111	1	CHP5	13.9835
BARCINO	82	2	AP5	11.5259			BOTONCILLO	113	2	AP5	4.41007			GUACIMA	93	1	CHP5	7.98349
BARCINO	82	2	CHP6	7.45932			BOTONCILLO	74	2	CHP6	8.57779			GUACIMA	84	2	CHP6	8.44216
BARCINO	91	2	CHP6	6.49887			BOTONCILLO	95	2	CHP6	8.33969			GUACIMA	93	2	CHP6	5.57271
BARCINO	109	2	CHP6	2.91607			BOTONCILLO	104	2	CHP6	19.1065			GUACIMA	102	2	CHP6	4.75852
BARCINO	100	2	CHP6	6.49887			BOTONCILLO	65	2	CHP6	19.1065			GUACIMA	111	2	CHP6	3.95307
BARCINO	82	2	SMP6	6.81279			BOTONCILLO	65	2	SMP6	12.376			GUACIMA	45	3	CHP1	3.57289
BARCINO	91	2	SMP6	17.2626			BOTONCILLO	104	2	SMP6	3.80076			GUACIMA	36	3	CHP1	15.7199
BARCINO	100	2	SMP6	16.0702			BOTONCILLO	113	2	SMP6	4.79084			GUACIMA	6	3	CHP1	8.0572
BARCINO	109	2	SMP6	4.34984			BOTONCILLO	74	2	SMP6	4.79084			GUACIMA	84	3	CHP1	11.0762
BARCINO	34	3	AP4	6.82015			BOTONCILLO	8	3	AP4	16.6308			GUACIMA	84	1	SMP2	3.86028
BARCINO	43	3	AP4	8.63695			BOTONCILLO	17	3	AP4	7.00455			GUACIMA	102	1	SMP2	13.3886
BARCINO	91	3	AP4	13.173			BOTONCILLO	74	3	AP4	9.09619			GUACIMA	111	1	SMP2	13.3226
BARCINO	109	3	AP4	16.2324			BOTONCILLO	95	3	AP4	9.09619			GUACIMA	93	1	SMP2	18.282
BARCINO	34	3	CHP1	13.5236			BOTONCILLO	65	3	CHP1	9.22619			GUACIMA	63	2	SMP6	17.0815
BARCINO	43	3	CHP1	6.01549			BOTONCILLO	8	3	CHP1	9.09729			GUACIMA	93	2	SMP6	14.2275
BARCINO	82	3	CHP1	9.55506			BOTONCILLO	95	3	CHP1	4.64941			GUACIMA	102	2	SMP6	3.10401
BARCINO	4	3	CHP1	8.7474			BOTONCILLO	74	3	CHP1	14.509			GUACIMA	111	2	SMP6	5.03414
BARCINO	4	3	SMP1	15.3908			BOTONCILLO	8	3	SMP1	35.2939			GUACIMA	36	3	SMP1	86.145
BARCINO	34	3	SMP1	15.209			BOTONCILLO	47	3	SMP1	10.6772			GUACIMA	45	3	SMP1	10.6819
BARCINO	43	3	SMP1	26.8124			BOTONCILLO	74	3	SMP1	9.86347			GUACIMA	15	3	SMP1	8.93498
BARCINO	61	3	SMP1	11.161			BOTONCILLO	17	3	SMP1	17.2482			GUACIMA	6	3	SMP1	8.56498
				9.88416	5.32878						9.77753	6.62143						12.8448	14.0123
MAJAHUA	37	1	AP5	6.94834			CORAL	49	3	AP4	10.2134			CAHUANANCE	69	1	AP5	3.56085
MAJAHUA	115	1	AP5	2.75135			CORAL	118	3	AP4	10.2062			CAHUANANCE	108	1	AP5	11.4023
MAJAHUA	106	1	AP5	5.9569			CORAL	22	3	AP4	13.2062			CAHUANANCE	117	1	AP5	13.638
MAJAHUA	67	1	AP5	9.31496			CORAL	31	3	AP4	10.4961			CAHUANANCE	87	1	AP5	15.479
MAJAHUA	76	2	AP5	14.4362			CORAL	70	1	AP5	6.02057			CAHUANANCE	117	2	AP5	17.7398
MAJAHUA	115	2	AP5	8.66788			CORAL	49	1	AP5	3.9353			CAHUANANCE	39	2	AP5	34.3726
MAJAHUA	85	2	AP5	23.7655			CORAL	88	1	AP5	8.81998			CAHUANANCE	87	2	AP5	7.23322
MAJAHUA	19	2	AP5	6.85443			CORAL	97	1	AP5	9.95211			CAHUANANCE	108	2	AP5	22.2217
MAJAHUA	19	3	AP4	21.5198			CORAL	88	2	AP5	10.7539			CAHUANANCE	117	3	AP4	18.9153
MAJAHUA	106	3	AP4	8.0516			CORAL	97	2	AP5	8.94042			CAHUANANCE	108	3	AP4	12.3204
MAJAHUA	58	3	AP4	10.0773			CORAL	118	2	AP5	7.57657			CAHUANANCE	87	3	AP4	15.387
MAJAHUA	76	3	AP4	25.8618			CORAL	70	2	AP5	4.65711			CAHUANANCE	12	3	AP4	5.21246
MAJAHUA	19	1	CHP5	2.00831			CORAL	31	3	CHP1	4.85795			CAHUANANCE	60	1	CHP5	1.81215
MAJAHUA	106	1	CHP5	12.5875			CORAL	49	3	CHP1	16.9657			CAHUANANCE	69	1	CHP5	5.73086
MAJAHUA	76	1	CHP5	1.80428			CORAL	90	3	CHP1	3.58782			CAHUANANCE	117	1	CHP5	27.2195
MAJAHUA		1	CHP5	1.80428			CORAL	22	3	CHP1	3.78157			CAHUANANCE	87	1	CHP5	7.00238
MAJAHUA	37	2	CHP6	23.4027			CORAL	88	1	CHP5	8.09299			CAHUANANCE	39	2	CHP6	18.546
MAJAHUA	76	2	CHP6	7.66269			CORAL	97	1	CHP5	8.11963			CAHUANANCE	87	2	CHP6	3.52192
MAJAHUA	85	2	CHP6	10.9415			CORAL	79	1	CHP5	6.11982			CAHUANANCE	78	2	CHP6	16.1009
MAJAHUA	106	2	CHP6	12.7081			CORAL	118	1	CHP5	8.11963			CAHUANANCE	117	2	CHP6	3.29981
MAJAHUA	19	3	CHP1	15.5303			CORAL	88	2	CHP6	8.56273			CAHUANANCE	21	3	CHP1	7.69733
MAJAHUA	10	3	CHP1	5.53022			CORAL	97	2	CHP6	8.01065			CAHUANANCE	12	3	CHP1	50.7002
MAJAHUA	37	3	CHP1	15.9603			CORAL	118	2	CHP6	3.33654			CAHUANANCE	60	3	CHP1	14.0379
MAJAHUA	58	3	CHP1	10.4266			CORAL	79	2	CHP6	7.78654			CAHUANANCE	69	3	CHP1	6.8816
MAJAHUA	58	1	SMP2	3.10184			CORAL	40	3	SMP1	3.04088			CAHUANANCE	39	1	SMP2	6.00873
MAJAHUA	76	1	SMP2	5.91257			CORAL	118	3	SMP1	6.61899			CAHUANANCE	78	1	SMP2	6.22107
MAJAHUA	85	1	SMP2	4.82735			CORAL	22	3	SMP1	6.8991			CAHUANANCE	60	1	SMP2	6.19901
MAJAHUA	28	1	SMP2	43.3395			CORAL	31	3	SMP1	5.61679			CAHUANANCE	69	1	SMP2	4.10087
MAJAHUA	115	2	SMP6	8.44722			CORAL	70	1	SMP2	7.8991			CAHUANANCE	87	2	SMP6	7.69935
MAJAHUA	76	2	SMP6	8.12722			CORAL	97	1	SMP2	5.418			CAHUANANCE	78	2	SMP6	13.2275
MAJAHUA	106	2	SMP6	9.95703			CORAL	88	1	SMP2	8.8991			CAHUANANCE	117	2	SMP6	13.8471
MAJAHUA	85	2	SMP6	9.01703			CORAL	79	1	SMP2	8.9619			CAHUANANCE	108	2	SMP6	6.65311
MAJAHUA	10	3	SMP1	1.99264			CORAL	79	2	SMP6	6.31254			CAHUANANCE	21	3	SMP1	4.31311
MAJAHUA	19	3	SMP1	3.35025			CORAL	88	2	SMP6	11.2974			CAHUANANCE	12	3	SMP1	23.1131
MAJAHUA	37	3	SMP1	2.20822			CORAL	97	2	SMP6	10.9613			CAHUANANCE	30	3	SMP1	12.1152
MAJAHUA	115	3	SMP1	12.9906			CORAL	118	2	SMP6	7.31378			CAHUANANCE	78	3	SMP1	13.9011
				10.4957	8.53682						7.81551	2.94999						12.7065	9.84395
LLORASANGRE	94	1	AP5	3.38776
LLORASANGRE	55	1	AP5	2.53252
LLORASANGRE	112	1	AP5	2.07588
LLORASANGRE	73	1	AP5	3.66265
LLORASANGRE	112	1	CHP5	1.56894
LLORASANGRE	103	1	CHP5	0.128201
LLORASANGRE	73	2	CHP5	0.869581
LLORASANGRE	94	1	CHP5	0.0102023
LLORASANGRE	73	1	SMP2	0.94483
LLORASANGRE	103	1	SMP2	4.4624
LLORASANGRE	94	1	SMP2	0.102023
LLORASANGRE	112	1	SMP2	3.21485
LLORASANGRE	94	2	AP5	1.2453
LLORASANGRE	112	2	AP5	0.36761
LLORASANGRE	55	2	AP5	2.66799
LLORASANGRE	64	2	AP5	4.19273
LLORASANGRE	73	2	CHP6	2.16049
LLORASANGRE	112	2	CHP6	2.12647
LLORASANGRE	94	2	CHP6	2.16049
LLORASANGRE	64	2	CHP6	2.9299
LLORASANGRE	73	2	SMP6	1.12692
LLORASANGRE	94	2	SMP6	3.63506
LLORASANGRE	112	2	SMP6	1.2453
LLORASANGRE	103	2	SMP6	0.36761
LLORASANGRE	103	3	AP4	2.66799
LLORASANGRE	46	3	AP4	4.19273
LLORASANGRE	94	3	AP4	2.12647
LLORASANGRE	64	3	AP4	3.8432
LLORASANGRE	7	3	CHP1	4.93897
LLORASANGRE	64	3	CHP1	0.696847
LLORASANGRE	94	3	CHP1	0.586035
LLORASANGRE	46	3	CHP1	3.56147
LLORASANGRE	7	3	SMP1	0.184529
LLORASANGRE	16	3	SMP1	2.77159
LLORASANGRE	25	3	SMP1	0.0718687
LLORASANGRE	46	3	SMP1	0.374589
				2.03339	1.47264

## Sheet: Herbivoría
ESPECIE	#	SITIO	TRATAMIENTO	%HERBIVORÍA	DESV.EST.		ESPECIE	#	SITIO	TRATAMIENTO	%HERBIVORÍA	DESV. EST		ESPECIE	#	SITIO	TRATAMIENTO	%HERBIVORÍA	DESV. EST
BARCINO	61	1	AP5	7.1204			BARCINO	82	1	CHP5	6.59745			BARCINO	82	1	SMP2	9.64458
BARCINO	82	1	AP5	9.53246			BARCINO	100	1	CHP5	6.99173			BARCINO	91	1	SMP2	8.7474
BARCINO	100	1	AP5	7.6215			BARCINO	109	1	CHP5	4.60553			BARCINO	100	1	SMP2	18.4169
BARCINO	109	1	AP5	9.68432			BARCINO	91	1	CHP5	1.33028			BARCINO	109	1	SMP2	2.21318
BARCINO	91	2	AP5	17.8773			BARCINO	82	2	CHP6	7.45932			BARCINO	82	2	SMP6	6.81279
BARCINO	109	2	AP5	7.31941			BARCINO	91	2	CHP6	6.49887			BARCINO	91	2	SMP6	17.2626
BARCINO	100	2	AP5	7.45566			BARCINO	109	2	CHP6	2.91607			BARCINO	100	2	SMP6	16.0702
BARCINO	82	2	AP5	11.5259			BARCINO	100	2	CHP6	6.49887			BARCINO	109	2	SMP6	4.34984
BARCINO	34	3	AP4	6.82015			BARCINO	34	3	CHP1	13.5236			BARCINO	4	3	SMP1	15.3908
BARCINO	43	3	AP4	8.63695			BARCINO	43	3	CHP1	6.01549			BARCINO	34	3	SMP1	15.209
BARCINO	91	3	AP4	13.173			BARCINO	82	3	CHP1	9.55506			BARCINO	43	3	SMP1	26.8124
BARCINO	109	3	AP4	16.2324			BARCINO	4	3	CHP1	8.7474			BARCINO	61	3	SMP1	11.161
				10.25	3.72264						6.72831	3.1284						12.6742	6.87044
BOTONCILLO	74	1	AP5	7.27442			BOTONCILLO	26	1	CHP5	15.8029			BOTONCILLO	56	1	SMP2	7.84122
BOTONCILLO	95	1	AP5	4.7374			BOTONCILLO	113	1	CHP5	1.03894			BOTONCILLO	104	1	SMP2	11.222
BOTONCILLO	65	1	AP5	5.14468			BOTONCILLO	104	1	CHP5	20.5073			BOTONCILLO	74	1	SMP2	7.14021
BOTONCILLO	113	1	AP5	5.14468			BOTONCILLO	56	1	CHP5	4.0254			BOTONCILLO	65	1	SMP2	7.11021
BOTONCILLO	56	2	AP5	3.81077			BOTONCILLO	74	2	CHP6	8.57779			BOTONCILLO	65	2	SMP6	12.376
BOTONCILLO	65	2	AP5	4.11677			BOTONCILLO	95	2	CHP6	8.33969			BOTONCILLO	104	2	SMP6	3.80076
BOTONCILLO	95	2	AP5	9.38299			BOTONCILLO	104	2	CHP6	19.1065			BOTONCILLO	113	2	SMP6	4.79084
BOTONCILLO	113	2	AP5	4.41007			BOTONCILLO	65	2	CHP6	19.1065			BOTONCILLO	74	2	SMP6	4.79084
BOTONCILLO	8	3	AP4	16.6308			BOTONCILLO	65	3	CHP1	9.22619			BOTONCILLO	8	3	SMP1	35.2939
BOTONCILLO	17	3	AP4	7.00455			BOTONCILLO	8	3	CHP1	9.09729			BOTONCILLO	47	3	SMP1	10.6772
BOTONCILLO	74	3	AP4	9.09619			BOTONCILLO	95	3	CHP1	4.64941			BOTONCILLO	74	3	SMP1	9.86347
BOTONCILLO	95	3	AP4	9.09619			BOTONCILLO	74	3	CHP1	14.509			BOTONCILLO	17	3	SMP1	17.2482
				7.15413	3.62071						11.1656	6.50021						11.0129	8.53608
GUACIMA	45	1	AP5	1.79227			GUACIMA	84	1	CHP5	13.9835			GUACIMA	84	1	SMP2	3.86028
GUACIMA	102	1	AP5	15.6256			GUACIMA	102	1	CHP5	14.3494			GUACIMA	102	1	SMP2	13.3886
GUACIMA	93	1	AP5	1.40567			GUACIMA	111	1	CHP5	13.9835			GUACIMA	111	1	SMP2	13.3226
GUACIMA	111	1	AP5	19.4099			GUACIMA	93	1	CHP5	7.98349			GUACIMA	93	1	SMP2	18.282
GUACIMA	6	2	AP5	9.65582			GUACIMA	84	2	CHP6	8.44216			GUACIMA	63	2	SMP6	17.0815
GUACIMA	36	2	AP5	4.06536			GUACIMA	93	2	CHP6	5.57271			GUACIMA	93	2	SMP6	14.2275
GUACIMA	63	2	AP5	6.35928			GUACIMA	102	2	CHP6	4.75852			GUACIMA	102	2	SMP6	3.10401
GUACIMA	93	2	AP5	15.0858			GUACIMA	111	2	CHP6	3.95307			GUACIMA	111	2	SMP6	5.03414
GUACIMA	36	3	AP4	7.34293			GUACIMA	45	3	CHP1	3.57289			GUACIMA	36	3	SMP1	86.145
GUACIMA	63	3	AP4	16.2684			GUACIMA	36	3	CHP1	15.7199			GUACIMA	45	3	SMP1	10.6819
GUACIMA	111	3	AP4	25.931			GUACIMA	6	3	CHP1	8.0572			GUACIMA	15	3	SMP1	8.93498
GUACIMA	93	3	AP4	25.391			GUACIMA	84	3	CHP1	11.0762			GUACIMA	6	3	SMP1	8.56498
				12.3611	8.56004						9.28772	4.40719						16.8856	22.3644
MAJAHUA	37	1	AP5	6.94834			MAJAHUA	19	1	CHP5	2.00831			MAJAHUA	58	1	SMP2	3.10184
MAJAHUA	115	1	AP5	2.75135			MAJAHUA	106	1	CHP5	12.5875			MAJAHUA	76	1	SMP2	5.91257
MAJAHUA	106	1	AP5	5.9569			MAJAHUA	76	1	CHP5	1.80428			MAJAHUA	85	1	SMP2	4.82735
MAJAHUA	67	1	AP5	9.31496			MAJAHUA		1	CHP5	1.80428			MAJAHUA	28	1	SMP2	43.3395
MAJAHUA	76	2	AP5	14.4362			MAJAHUA	37	2	CHP6	23.4027			MAJAHUA	115	2	SMP6	8.44722
MAJAHUA	115	2	AP5	8.66788			MAJAHUA	76	2	CHP6	7.66269			MAJAHUA	76	2	SMP6	8.12722
MAJAHUA	85	2	AP5	23.7655			MAJAHUA	85	2	CHP6	10.9415			MAJAHUA	106	2	SMP6	9.95703
MAJAHUA	19	2	AP5	6.85443			MAJAHUA	106	2	CHP6	12.7081			MAJAHUA	85	2	SMP6	9.01703
MAJAHUA	19	3	AP4	21.5198			MAJAHUA	19	3	CHP1	15.5303			MAJAHUA	10	3	SMP1	1.99264
MAJAHUA	106	3	AP4	8.0516			MAJAHUA	10	3	CHP1	5.53022			MAJAHUA	19	3	SMP1	3.35025
MAJAHUA	58	3	AP4	10.0773			MAJAHUA	37	3	CHP1	15.9603			MAJAHUA	37	3	SMP1	2.20822
MAJAHUA	76	3	AP4	25.8618			MAJAHUA	58	3	CHP1	10.4266			MAJAHUA	115	3	SMP1	12.9906
				12.0172	7.62046						10.0306	6.63652						9.43929	11.2156
CORAL	49	3	AP4	10.2134			CORAL	31	3	CHP1	4.85795			CORAL	40	3	SMP1	3.04088
CORAL	118	3	AP4	10.2062			CORAL	49	3	CHP1	16.9657			CORAL	118	3	SMP1	6.61899
CORAL	22	3	AP4	13.2062			CORAL	90	3	CHP1	3.58782			CORAL	22	3	SMP1	6.8991
CORAL	31	3	AP4	10.4961			CORAL	22	3	CHP1	3.78157			CORAL	31	3	SMP1	5.61679
CORAL	70	1	AP5	6.02057			CORAL	88	1	CHP5	8.09299			CORAL	70	1	SMP2	7.8991
CORAL	49	1	AP5	3.9353			CORAL	97	1	CHP5	8.11963			CORAL	97	1	SMP2	5.418
CORAL	88	1	AP5	8.81998			CORAL	79	1	CHP5	6.11982			CORAL	88	1	SMP2	8.8991
CORAL	97	1	AP5	9.95211			CORAL	118	1	CHP5	8.11963			CORAL	79	1	SMP2	8.9619
CORAL	88	2	AP5	10.7539			CORAL	88	2	CHP6	8.56273			CORAL	79	2	SMP6	6.31254
CORAL	97	2	AP5	8.94042			CORAL	97	2	CHP6	8.01065			CORAL	88	2	SMP6	11.2974
CORAL	118	2	AP5	7.57657			CORAL	118	2	CHP6	3.33654			CORAL	97	2	SMP6	10.9613
CORAL	70	2	AP5	4.65711			CORAL	79	2	CHP6	7.78654			CORAL	118	2	SMP6	7.31378
				8.7315	2.72074						7.27847	3.65506						7.43657	2.35397
CAHUANANCE	69	1	AP5	3.56085			CAHUANANCE	60	1	CHP5	1.81215			CAHUANANCE	39	1	SMP2	6.00873
CAHUANANCE	108	1	AP5	11.4023			CAHUANANCE	69	1	CHP5	5.73086			CAHUANANCE	78	1	SMP2	6.22107
CAHUANANCE	117	1	AP5	13.638			CAHUANANCE	117	1	CHP5	27.2195			CAHUANANCE	60	1	SMP2	6.19901
CAHUANANCE	87	1	AP5	15.479			CAHUANANCE	87	1	CHP5	7.00238			CAHUANANCE	69	1	SMP2	4.10087
CAHUANANCE	117	2	AP5	17.7398			CAHUANANCE	39	2	CHP6	18.546			CAHUANANCE	87	2	SMP6	7.69935
CAHUANANCE	39	2	AP5	34.3726			CAHUANANCE	87	2	CHP6	3.52192			CAHUANANCE	78	2	SMP6	13.2275
CAHUANANCE	87	2	AP5	7.23322			CAHUANANCE	78	2	CHP6	16.1009			CAHUANANCE	117	2	SMP6	13.8471
CAHUANANCE	108	2	AP5	22.2217			CAHUANANCE	117	2	CHP6	3.29981			CAHUANANCE	108	2	SMP6	6.65311
CAHUANANCE	117	3	AP4	18.9153			CAHUANANCE	21	3	CHP1	7.69733			CAHUANANCE	21	3	SMP1	4.31311
CAHUANANCE	108	3	AP4	12.3204			CAHUANANCE	12	3	CHP1	50.7002			CAHUANANCE	12	3	SMP1	23.1131
CAHUANANCE	87	3	AP4	15.387			CAHUANANCE	60	3	CHP1	14.0379			CAHUANANCE	30	3	SMP1	12.1152
CAHUANANCE	12	3	AP4	5.21246			CAHUANANCE	69	3	CHP1	6.8816			CAHUANANCE	78	3	SMP1	13.9011
				14.7902	8.30711						13.5459	13.8984						9.78327	5.59701
LLORASANGRE	94	1	AP5	3.38776			LLORASANGRE	112	1	CHP5	1.56894			LLORASANGRE	73	1	SMP2	0.94483
LLORASANGRE	55	1	AP5	2.53252			LLORASANGRE	103	1	CHP5	0.128201			LLORASANGRE	103	1	SMP2	4.4624
LLORASANGRE	112	1	AP5	2.07588			LLORASANGRE	73	2	CHP5	0.869581			LLORASANGRE	94	1	SMP2	0.102023
LLORASANGRE	73	1	AP5	3.66265			LLORASANGRE	94	1	CHP5	0.0102023			LLORASANGRE	112	1	SMP2	3.21485
LLORASANGRE	94	2	AP5	1.2453			LLORASANGRE	73	2	CHP6	2.16049			LLORASANGRE	7	3	SMP1	0.184529
LLORASANGRE	112	2	AP5	0.36761			LLORASANGRE	112	2	CHP6	2.12647			LLORASANGRE	16	3	SMP1	2.77159
LLORASANGRE	55	2	AP5	2.66799			LLORASANGRE	94	2	CHP6	2.16049			LLORASANGRE	25	3	SMP1	0.0718687
LLORASANGRE	64	2	AP5	4.19273			LLORASANGRE	64	2	CHP6	2.9299			LLORASANGRE	46	3	SMP1	0.374589
LLORASANGRE	103	3	AP4	2.66799			LLORASANGRE	7	3	CHP1	4.93897			LLORASANGRE	73	2	SMP6	1.12692
LLORASANGRE	46	3	AP4	4.19273			LLORASANGRE	64	3	CHP1	0.696847			LLORASANGRE	94	2	SMP6	3.63506
LLORASANGRE	94	3	AP4	2.12647			LLORASANGRE	94	3	CHP1	0.586035			LLORASANGRE	112	2	SMP6	1.2453
LLORASANGRE	64	3	AP4	3.8432			LLORASANGRE	46	3	CHP1	3.56147			LLORASANGRE	103	2	SMP6	0.36761
				2.7469	1.18481						1.81147	1.48341						1.5418	1.5567

## Sheet: %HERB-TRAT
ESPECIE	TRATAMIENTO	%HERBIVORÍA	DESV. EST. % HERB
BARCINO	ACOLCHADO	10.25	3.72264
BOTONCILLO	ACOLCHADO	7.15413	3.62071
GUACIMA	ACOLCHADO	12.3611	8.56004
MAJAHUA	ACOLCHADO	12.0172	7.62046
CORAL	ACOLCHADO	8.7315	2.72074
CAHUANANCE	ACOLCHADO	14.7902	8.30711
LLORASANGRE	ACOLCHADO	2.7469	1.18481
ESPECIE	TRATAMIENTO	%HERBIVORÍA	DESV. EST. % HERB
BARCINO	CHAPEO	6.72831	3.1284
BOTONCILLO	CHAPEO	11.1656	6.50021
GUACIMA	CHAPEO	9.28772	4.40719
MAJAHUA	CHAPEO	10.0306	6.63652
CORAL	CHAPEO	7.27847	3.65506
CAHUANANCE	CHAPEO	13.5459	13.8984
LLORASANGRE	CHAPEO	1.81147	1.48341
ESPECIE	TRATAMIENTO	%HERBIVORÍA	DESV. EST. % HERB
BARCINO	SIN MANEJO	12.6742	6.87044
BOTONCILLO	SIN MANEJO	11.0129	8.53608
GUACIMA	SIN MANEJO	16.8856	22.3644
MAJAHUA	SIN MANEJO	9.43929	11.2156
CORAL	SIN MANEJO	7.43657	2.35397
CAHUANANCE	SIN MANEJO	9.78327	5.59701
LLORASANGRE	SIN MANEJO	1.5418	1.5567

## Sheet: GRAFICOS % HERB X TRAT
TRATAMIENTO	ESPECIE	PROMEDIO %HERBIVORÍA	DESV. EST. % HERB
ACOLCHADO	BARCINO	10.25	3.72264
ACOLCHADO	BOTONCILLO	7.15413	3.62071
ACOLCHADO	GUACIMA	12.3611	8.56004
ACOLCHADO	MAJAHUA	12.0172	7.62046
ACOLCHADO	CORAL	8.7315	2.72074
ACOLCHADO	CAHUANANCE	14.7902	8.30711
ACOLCHADO	LLORASANGRE	2.7469	1.18481
TRATAMIENTO	ESPECIE	PROMEDIO %HERBIVORÍA	DESV. EST. % HERB
CHAPEO	BARCINO	6.72831	3.1284
CHAPEO	BOTONCILLO	11.1656	6.50021
CHAPEO	GUACIMA	9.28772	4.40719
CHAPEO	MAJAHUA	10.0306	6.63652
CHAPEO	CORAL	7.27847	3.65506
CHAPEO	CAHUANANCE	13.5459	13.8984
CHAPEO	LLORASANGRE	1.81147	1.48341
TRATAMIENTO	ESPECIE	PROMEDIO%HERBIVORÍA	DESV. EST. % HERB
SIN MANEJO	BARCINO	12.6742	6.87044
SIN MANEJO	BOTONCILLO	11.0129	8.53608
SIN MANEJO	GUACIMA	16.8856	22.3644
SIN MANEJO	MAJAHUA	9.43929	11.2156
SIN MANEJO	CORAL	7.43657	2.35397
SIN MANEJO	CAHUANANCE	9.78327	5.59701
SIN MANEJO	LLORASANGRE	1.5418	1.5567

## Sheet: % HERB X ESPECIE
ESPECIE	PROMEDIO %HERBIVORÍA	DESV. EST.
BARCINO	9.88416	5.32878
MAJAHUA	10.4957	8.53682
LLORASANGRE	2.03339	1.47264
BOTONCILLO	9.77753	6.62143
CORAL	7.81551	2.94999
GUACIMA	12.8448	14.0123
CAHUANANCE	12.7065	9.84395

## Sheet: % HERB DE ESPECIES X TRAT
ESPECIE	TRATAMIENTO	%HERBIVORÍA	DESV.EST.
BARCINO	ACOLCHADO	10.25	3.72264
	CHAPEO	6.72831	3.1284
	SIN MANEJO	12.6742	6.87044
BOTONCILLO	ACOLCHADO	7.15413	3.62071
	CHAPEO	11.1656	6.50021
	SIN MANEJO	11.0129	8.53608
CAHUANANCE	ACOLCHADO	14.7902	8.30711
	CHAPEO	13.5459	13.8984
	SIN MANEJO	9.78327	5.59701
CORAL	ACOLCHADO	8.7315	2.72074
	SIN MANEJO	7.43657	2.35397
	CHAPEO	7.27847	3.65506
GUACIMA	ACOLCHADO	12.3611	8.56004
	CHAPEO	9.28772	4.40719
	SIN MANEJO	16.8856	22.3644
LLORASANGRE	ACOLCHADO	2.7469	1.18481
	CHAPEO	1.81147	1.48341
	SIN MANEJO	1.5418	1.5567
MAJAHUA	ACOLCHADO	12.0172	7.62046
	CHAPEO	10.0306	6.63652
	SIN MANEJO	9.43929	11.2156

## Sheet: % herbivory
species	individual	site	treatment	% HERBIVORY
Cordia elaeagnoides	61	1	mulching	7.1204
Cordia elaeagnoides	82	1	mulching	9.53246
Cordia elaeagnoides	100	1	mulching	7.6215
Cordia elaeagnoides	109	1	mulching	9.68432
Cordia elaeagnoides	91	2	mulching	17.8773
Cordia elaeagnoides	109	2	mulching	7.31941
Cordia elaeagnoides	100	2	mulching	7.45566
Cordia elaeagnoides	82	2	mulching	11.5259
Cordia elaeagnoides	34	3	mulching	6.82015
Cordia elaeagnoides	43	3	mulching	8.63695
Cordia elaeagnoides	91	3	mulching	13.173
Cordia elaeagnoides	109	3	mulching	16.2324
Cordia elaeagnoides	82	1	weeding	6.59745
Cordia elaeagnoides	100	1	weeding	6.99173
Cordia elaeagnoides	109	1	weeding	4.60553
Cordia elaeagnoides	91	1	weeding	1.33028
Cordia elaeagnoides	82	2	weeding	7.45932
Cordia elaeagnoides	91	2	weeding	6.49887
Cordia elaeagnoides	109	2	weeding	2.91607
Cordia elaeagnoides	100	2	weeding	6.49887
Cordia elaeagnoides	34	3	weeding	13.5236
Cordia elaeagnoides	43	3	weeding	6.01549
Cordia elaeagnoides	82	3	weeding	9.55506
Cordia elaeagnoides	4	3	weeding	8.7474
Cordia elaeagnoides	82	1	control	9.64458
Cordia elaeagnoides	91	1	control	8.7474
Cordia elaeagnoides	100	1	control	18.4169
Cordia elaeagnoides	82	2	control	6.81279
Cordia elaeagnoides	91	2	control	17.2626
Cordia elaeagnoides	100	2	control	16.0702
Cordia elaeagnoides	109	2	control	4.34984
Cordia elaeagnoides	4	3	control	15.3908
Cordia elaeagnoides	34	3	control	15.209
Cordia elaeagnoides	43	3	control	26.8124
Cordia elaeagnoides	61	3	control	11.161
Cordia elaeagnoides	109	1	control	2.21318
Cordia alliodora	74	1	mulching	7.27442
Cordia alliodora	95	1	mulching	4.7374
Cordia alliodora	65	1	mulching	5.14468
Cordia alliodora	113	1	mulching	5.14468
Cordia alliodora	56	2	mulching	3.81077
Cordia alliodora	65	2	mulching	4.11677
Cordia alliodora	95	2	mulching	9.38299
Cordia alliodora	113	2	mulching	4.41007
Cordia alliodora	8	3	mulching	16.6308
Cordia alliodora	17	3	mulching	7.00455
Cordia alliodora	74	3	mulching	9.09619
Cordia alliodora	95	3	mulching	9.09619
Cordia alliodora	26	1	weeding	15.8029
Cordia alliodora	113	1	weeding	1.03894
Cordia alliodora	104	1	weeding	20.5073
Cordia alliodora	56	1	weeding	4.0254
Cordia alliodora	74	2	weeding	8.57779
Cordia alliodora	95	2	weeding	8.33969
Cordia alliodora	104	2	weeding	19.1065
Cordia alliodora	65	2	weeding	19.1065
Cordia alliodora	65	3	weeding	9.22619
Cordia alliodora	8	3	weeding	9.09729
Cordia alliodora	95	3	weeding	4.64941
Cordia alliodora	74	3	weeding	14.509
Cordia alliodora	56	1	control	7.84122
Cordia alliodora	104	1	control	11.222
Cordia alliodora	74	1	control	7.14021
Cordia alliodora	65	1	control	7.11021
Cordia alliodora	65	2	control	12.376
Cordia alliodora	104	2	control	3.80076
Cordia alliodora	113	2	control	4.79084
Cordia alliodora	74	2	control	4.79084
Cordia alliodora	8	3	control	35.2939
Cordia alliodora	47	3	control	10.6772
Cordia alliodora	74	3	control	9.86347
Cordia alliodora	17	3	control	17.2482
Gliricidia sepium	69	1	mulching	3.56085
Gliricidia sepium	108	1	mulching	11.4023
Gliricidia sepium	117	1	mulching	13.638
Gliricidia sepium	87	1	mulching	15.479
Gliricidia sepium	117	2	mulching	17.7398
Gliricidia sepium	39	2	mulching	34.3726
Gliricidia sepium	87	2	mulching	7.23322
Gliricidia sepium	108	2	mulching	22.2217
Gliricidia sepium	117	3	mulching	18.9153
Gliricidia sepium	108	3	mulching	12.3204
Gliricidia sepium	87	3	mulching	15.387
Gliricidia sepium	12	3	mulching	5.21246
Gliricidia sepium	60	1	weeding	1.81215
Gliricidia sepium	69	1	weeding	5.73086
Gliricidia sepium	117	1	weeding	27.2195
Gliricidia sepium	87	1	weeding	7.00238
Gliricidia sepium	39	2	weeding	18.546
Gliricidia sepium	87	2	weeding	3.52192
Gliricidia sepium	78	2	weeding	16.1009
Gliricidia sepium	117	2	weeding	3.29981
Gliricidia sepium	21	3	weeding	7.69733
Gliricidia sepium	12	3	weeding	50.7002
Gliricidia sepium	60	3	weeding	14.0379
Gliricidia sepium	69	3	weeding	6.8816
Gliricidia sepium	39	1	control	6.00873
Gliricidia sepium	78	1	control	6.22107
Gliricidia sepium	60	1	control	6.19901
Gliricidia sepium	69	1	control	4.10087
Gliricidia sepium	87	2	control	7.69935
Gliricidia sepium	78	2	control	13.2275
Gliricidia sepium	117	2	control	13.8471
Gliricidia sepium	108	2	control	6.65311
Gliricidia sepium	21	3	control	4.31311
Gliricidia sepium	12	3	control	23.1131
Gliricidia sepium	30	3	control	12.1152
Gliricidia sepium	78	3	control	13.9011
Caesalpinia platyloba	49	3	mulching	10.2134
Caesalpinia platyloba	118	3	mulching	10.2062
Caesalpinia platyloba	22	3	mulching	13.2062
Caesalpinia platyloba	31	3	mulching	10.4961
Caesalpinia platyloba	70	1	mulching	6.02057
Caesalpinia platyloba	49	1	mulching	3.9353
Caesalpinia platyloba	88	1	mulching	8.81998
Caesalpinia platyloba	97	1	mulching	9.95211
Caesalpinia platyloba	88	2	mulching	10.7539
Caesalpinia platyloba	97	2	mulching	8.94042
Caesalpinia platyloba	118	2	mulching	7.57657
Caesalpinia platyloba	70	2	mulching	4.65711
Caesalpinia platyloba	31	3	weeding	4.85795
Caesalpinia platyloba	49	3	weeding	16.9657
Caesalpinia platyloba	90	3	weeding	3.58782
Caesalpinia platyloba	22	3	weeding	3.78157
Caesalpinia platyloba	88	1	weeding	8.09299
Caesalpinia platyloba	97	1	weeding	8.11963
Caesalpinia platyloba	79	1	weeding	6.11982
Caesalpinia platyloba	118	1	weeding	8.11963
Caesalpinia platyloba	88	2	weeding	8.56273
Caesalpinia platyloba	97	2	weeding	8.01065
Caesalpinia platyloba	118	2	weeding	3.33654
Caesalpinia platyloba	40	3	control	3.04088
Caesalpinia platyloba	118	3	control	6.61899
Caesalpinia platyloba	22	3	control	6.8991
Caesalpinia platyloba	31	3	control	5.61679
Caesalpinia platyloba	70	1	control	7.8991
Caesalpinia platyloba	97	1	control	5.418
Caesalpinia platyloba	88	1	control	8.8991
Caesalpinia platyloba	79	1	control	8.9619
Caesalpinia platyloba	79	2	control	6.31254
Caesalpinia platyloba	88	2	control	11.2974
Caesalpinia platyloba	97	2	control	10.9613
Caesalpinia platyloba	118	2	control	7.31378
Caesalpinia platyloba	79	2	weeding	7.78654
Guazuma ulmifolia	45	1	mulching	1.79227
Guazuma ulmifolia	102	1	mulching	15.6256
Guazuma ulmifolia	93	1	mulching	1.40567
Guazuma ulmifolia	111	1	mulching	19.4099
Guazuma ulmifolia	6	2	mulching	9.65582
Guazuma ulmifolia	36	2	mulching	4.06536
Guazuma ulmifolia	63	2	mulching	6.35928
Guazuma ulmifolia	93	2	mulching	15.0858
Guazuma ulmifolia	36	3	mulching	7.34293
Guazuma ulmifolia	63	3	mulching	16.2684
Guazuma ulmifolia	111	3	mulching	25.931
Guazuma ulmifolia	93	3	mulching	25.391
Guazuma ulmifolia	84	1	weeding	13.9835
Guazuma ulmifolia	102	1	weeding	14.3494
Guazuma ulmifolia	111	1	weeding	13.9835
Guazuma ulmifolia	93	1	weeding	7.98349
Guazuma ulmifolia	84	2	weeding	8.44216
Guazuma ulmifolia	93	2	weeding	5.57271
Guazuma ulmifolia	102	2	weeding	4.75852
Guazuma ulmifolia	111	2	weeding	3.95307
Guazuma ulmifolia	45	3	weeding	3.57289
Guazuma ulmifolia	36	3	weeding	15.7199
Guazuma ulmifolia	6	3	weeding	8.0572
Guazuma ulmifolia	84	3	weeding	11.0762
Guazuma ulmifolia	84	1	control	3.86028
Guazuma ulmifolia	102	1	control	13.3886
Guazuma ulmifolia	111	1	control	13.3226
Guazuma ulmifolia	93	1	control	18.282
Guazuma ulmifolia	63	2	control	17.0815
Guazuma ulmifolia	93	2	control	14.2275
Guazuma ulmifolia	102	2	control	3.10401
Guazuma ulmifolia	111	2	control	5.03414
Guazuma ulmifolia	36	3	control	86.145
Guazuma ulmifolia	45	3	control	10.6819
Guazuma ulmifolia	15	3	control	8.93498
Guazuma ulmifolia	6	3	control	8.56498
Apoplanesia paniculada	94	1	mulching	3.38776
Apoplanesia paniculada	55	1	mulching	2.53252
Apoplanesia paniculada	112	1	mulching	2.07588
Apoplanesia paniculada	73	1	mulching	3.66265
Apoplanesia paniculada	94	2	mulching	1.2453
Apoplanesia paniculada	112	2	mulching	0.36761
Apoplanesia paniculada	55	2	mulching	2.66799
Apoplanesia paniculada	64	2	mulching	4.19273
Apoplanesia paniculada	103	3	mulching	2.66799
Apoplanesia paniculada	46	3	mulching	4.19273
Apoplanesia paniculada	94	3	mulching	2.12647
Apoplanesia paniculada	64	3	mulching	3.8432
Apoplanesia paniculada	112	1	weeding	1.56894
Apoplanesia paniculada	103	1	weeding	0.128201
Apoplanesia paniculada	73	2	weeding	0.869581
Apoplanesia paniculada	94	1	weeding	0.0102023
Apoplanesia paniculada	73	2	weeding	2.16049
Apoplanesia paniculada	112	2	weeding	2.12647
Apoplanesia paniculada	94	2	weeding	2.16049
Apoplanesia paniculada	64	2	weeding	2.9299
Apoplanesia paniculada	7	3	weeding	4.93897
Apoplanesia paniculada	64	3	weeding	0.696847
Apoplanesia paniculada	94	3	weeding	0.586035
Apoplanesia paniculada	46	3	weeding	3.56147
Apoplanesia paniculada	73	1	control	0.94483
Apoplanesia paniculada	103	1	control	4.4624
Apoplanesia paniculada	94	1	control	0.102023
Apoplanesia paniculada	112	1	control	3.21485
Apoplanesia paniculada	7	3	control	0.184529
Apoplanesia paniculada	16	3	control	2.77159
Apoplanesia paniculada	25	3	control	0.0718687
Apoplanesia paniculada	46	3	control	0.374589
Apoplanesia paniculada	73	2	control	1.12692
Apoplanesia paniculada	94	2	control	3.63506
Apoplanesia paniculada	112	2	control	1.2453
Apoplanesia paniculada	103	2	control	0.36761
Heliocarpus pallidus	37	1	mulching	6.94834
Heliocarpus pallidus	115	1	mulching	2.75135
Heliocarpus pallidus	106	1	mulching	5.9569
Heliocarpus pallidus	67	1	mulching	9.31496
Heliocarpus pallidus	76	2	mulching	14.4362
Heliocarpus pallidus	115	2	mulching	8.66788
Heliocarpus pallidus	85	2	mulching	23.7655
Heliocarpus pallidus	19	2	mulching	6.85443
Heliocarpus pallidus	19	3	mulching	21.5198
Heliocarpus pallidus	106	3	mulching	8.0516
Heliocarpus pallidus	58	3	mulching	10.0773
Heliocarpus pallidus	76	3	mulching	25.8618
Heliocarpus pallidus	19	1	weeding	2.00831
Heliocarpus pallidus	106	1	weeding	12.5875
Heliocarpus pallidus	76	1	weeding	1.80428
Heliocarpus pallidus	85	1	weeding	1.80428
Heliocarpus pallidus	37	2	weeding	23.4027
Heliocarpus pallidus	76	2	weeding	7.66269
Heliocarpus pallidus	85	2	weeding	10.9415
Heliocarpus pallidus	106	2	weeding	12.7081
Heliocarpus pallidus	19	3	weeding	15.5303
Heliocarpus pallidus	10	3	weeding	5.53022
Heliocarpus pallidus	37	3	weeding	15.9603
Heliocarpus pallidus	58	3	weeding	10.4266
Heliocarpus pallidus	58	1	control	3.10184
Heliocarpus pallidus	76	1	control	5.91257
Heliocarpus pallidus	85	1	control	4.82735
Heliocarpus pallidus	28	1	control	43.3395
Heliocarpus pallidus	115	2	control	8.44722
Heliocarpus pallidus	76	2	control	8.12722
Heliocarpus pallidus	106	2	control	9.95703
Heliocarpus pallidus	85	2	control	9.01703
Heliocarpus pallidus	10	3	control	1.99264
Heliocarpus pallidus	19	3	control	3.35025
Heliocarpus pallidus	37	3	control	2.20822
Heliocarpus pallidus	115	3	control	12.9906

## Sheet: lepidopteran
Date	Site	Treatment	Plant species	Plant number	Lep id	Lep Family	Lep species	Abundance
dec	3	control	Caesalpinia platyloba	40	O618	Aididae	Aididae sp1	2
aug	3	weeding	Gliricidia sepium	21	O56	Arctiidae	Arctiidae sp1	1
sep	3	mulching	Gliricidia sepium	108	O56	Arctiidae	Arctiidae sp1	1
dec	1	control	Gliricidia sepium	60	O56	Arctiidae	Arctiidae sp1	1
oct	2	control	Guazuma ulmifolia	93	O8	Arctiidae	Lophocampa debilis	1
oct	2	weeding	Gliricidia sepium	78	O8	Arctiidae	Lophocampa debilis	4
dec	2	control	Leucaena leucocephala	48	O8	Arctiidae	Lophocampa debilis	1
oct	2	control	Gliricidia sepium	78	O366	Crambidae	Crambidae sp1	1
aug	3	weeding	Gliricidia sepium	60	O600	Crambidae	Crambidae sp1	1
aug	3	weeding	Gliricidia sepium	60	O600	Crambidae	Crambidae sp1	1
oct	2	control	Heliocarpus pallidus	76	O69	Crambidae	Diaphania prob. Jairusalis	1
nov	2	control	Heliocarpus pallidus	85	O69	Crambidae	Diaphania prob. Jairusalis	1
dec	3	weeding	Guazuma ulmifolia	84	O69	Crambidae	Diaphania prob. Jairusalis	1
nov	3	mulching	Heliocarpus pallidus	76	O96	Crambidae	Syllepis hortalis	1
nov	2	weeding	Guazuma ulmifolia	111	O96	Crambidae	Syllepis hortalis	5
nov	2	weeding	Caesalpinia platyloba	97	O96	Crambidae	Syllepis hortalis	1
nov	2	weeding	Heliocarpus pallidus	106	O96	Crambidae	Syllepis hortalis	1
nov	2	control	Heliocarpus pallidus	85	O96	Crambidae	Syllepis hortalis	1
nov	1	control	Caesalpinia platyloba	70	O96	Crambidae	Syllepis hortalis	1
nov	2	mulching	Caesalpinia platyloba	70	O96	Crambidae	Syllepis hortalis	1
nov	2	mulching	Caesalpinia platyloba	70	O96	Crambidae	Syllepis hortalis	1
nov	3	mulching	Guazuma ulmifolia	36	O96	Crambidae	Syllepis hortalis	1
oct	2	control	Caesalpinia pulcherrima	101	O161	Dalceridae	Dalceridae sp1	1
nov	3	mulching	Caesalpinia pulcherrima	92	O161	Dalceridae	Dalceridae sp1	1
nov	3	weeding	Caesalpinia pulcherrima	44	O161	Dalceridae	Dalceridae sp1	1
nov	3	mulching	Caesalpinia pulcherrima	53	O161	Dalceridae	Dalceridae sp1	1
nov	3	mulching	Leucaena leucocephala	18	O161	Dalceridae	Dalceridae sp1	6
dec	1	control	Caesalpinia platyloba	97	O11	Geometridae	Euacidalia certissa	1
dec	3	weeding	Lysiloma microphyllum	32	O165	Geometridae	Geometridae sp1	1
oct	2	weeding	Cordia alliodora	65	O200	Geometridae	Pterocypha sp.	1
oct	3	weeding	Cordia elaeagnoides	43	O202	Geometridae	Geometridae sp2	1
nov	2	mulching	Leucaena leucocephala	66	O324	Geometridae	Selenia eucare	1
nov	1	mulching	Cordia elaeagnoides	109	O348	Geometridae	Geometridae sp3	1
aug	1	control	Caesalpinia pulcherrima	83	O601	Geometridae	Geometridae sp5	1
dec	3	control	Cordia elaeagnoides	43	O77	Geometridae	Geometridae sp4	1
aug	1	weeding	Apoplanesia paniculada	112	O223	Hesperidae	Codatractus sp.	1
aug	1	control	Guazuma ulmifolia	84	O223	Hesperidae	Codatractus sp.	1
aug	3	weeding	Gliricidia sepium	60	O223	Hesperidae	Codatractus sp.	1
nov	2	weeding	Gliricidia sepium	117	O320	Hesperidae	Hesperidae sp1	1
nov	1	control	Gliricidia sepium	69	O320	Hesperidae	Hesperidae sp1	1
nov	1	control	Gliricidia sepium	60	O320	Hesperidae	Hesperidae sp1	1
nov	1	control	Gliricidia sepium	39	O320	Hesperidae	Hesperidae sp1	1
nov	3	weeding	Gliricidia sepium	21	O320	Hesperidae	Hesperidae sp1	1
nov	3	weeding	Gliricidia sepium	12	O320	Hesperidae	Hesperidae sp1	1
dec	2	weeding	Gliricidia sepium	39	O320	Hesperidae	Hesperidae sp1	1
sep	3	control	Guazuma ulmifolia	45	O570	Hesperidae	Hesperidae sp2	1
dec	1	weeding	Heliocarpus pallidus	19	O29	Limacodidae	Euclea sp	1
aug	2	mulching	Guazuma ulmifolia	6	O30	Limantridae	Orgya sp	1
aug	2	weeding	Gliricidia sepium	117	O30	Limantridae	Orgya sp	1
aug	2	weeding	Gliricidia sepium	78	O30	Limantridae	Orgya sp	1
aug	1	weeding	Guazuma ulmifolia	93	O30	Limantridae	Orgya sp	1
aug	1	weeding	Guazuma ulmifolia	84	O30	Limantridae	Orgya sp	1
aug	3	weeding	Apoplanesia paniculada	64	O30	Limantridae	Orgya sp	2
aug	3	weeding	Apoplanesia paniculada	94	O30	Limantridae	Orgya sp	1
sep	3	mulching	Leucaena leucocephala	36	O30	Limantridae	Orgya sp	1
sep	3	mulching	Gliricidia sepium		O30	Limantridae	Orgya sp	1
nov	2	control	Guazuma ulmifolia	111	O30	Limantridae	Orgya sp	1
nov	2	weeding	Gliricidia sepium	117	O30	Limantridae	Orgya sp	1
nov	1	mulching	Leucaena leucocephala	57	O30	Limantridae	Orgya sp	1
nov	3	control	Gliricidia sepium	30	O30	Limantridae	Orgya sp	2
dec	3	weeding	Caesalpinia eriostachys	3	O30	Limantridae	Orgya sp	1
aug	2	mulching	Guazuma ulmifolia	36	O30	Limantridae	Orgya sp	4
aug	3	weeding	Leucaena leucocephala	9	O30	Limantridae	Orgya sp	1
sep	3	mulching	Gliricidia sepium	108	O30	Limantridae	Orgya sp	1
oct	2	weeding	Gliricidia sepium	117	O30	Limantridae	Orgya sp	1
oct	1	mulching	Gliricidia sepium	117	O30	Limantridae	Orgya sp	1
oct	3	weeding	Gliricidia sepium	21	O30	Limantridae	Orgya sp	1
nov	2	control	Apoplanesia paniculada	112	O30	Limantridae	Orgya sp	1
nov	2	control	Leucaena leucocephala	75	O30	Limantridae	Orgya sp	1
dec	2	control	Caesalpinia eriostachys	90	O30	Limantridae	Orgya sp	1
dec	3	control	Caesalpinia eriostachys	3	O30	Limantridae	Orgya sp	1
dec	3	control	Guazuma ulmifolia	6	O30	Limantridae	Orgya sp	1
aug	1	mulching	Leucaena leucocephala	114	O2	Megalopygidae	Megalopyge rabida	1
nov	2	control	Lysiloma microphyllum	119	O54	Megalopygidae	Megalopygidae sp1	1
dec	1	mulching	Heliocarpus pallidus	115	O12	Noctuidae	Anomis editrix	1
nov	3	weeding	Leucaena leucocephala	27	O189	Noctuidae	Noctuidae sp1	1
oct	3	control	Gliricidia sepium	30	O208	Noctuidae	Noctuidae sp1	1
oct	2	control	Cordia elaeagnoides	82	O319	Noctuidae	Chasimina mexicana	2
aug	3	weeding	Lysiloma microphyllum	41	O449	Noctuidae	Noctuidae sp2	1
dec	2	mulching	Leucaena leucocephala	114	O449	Noctuidae	Noctuidae sp2	1
dec	3	control	Leucaena leucocephala	75	O449	Noctuidae	Noctuidae sp2	1
oct	2	mulching	Cordia alliodora	113	O52	Noctuidae	Gonodonta pyrgo	1
oct	2	mulching	Gliricidia sepium	39	O526	Noctuidae	Noctuidae sp3	1
dec	2	weeding	Lysiloma microphyllum	89	O619	Noctuidae	Noctuidae sp4	1
oct	1	control	Caesalpinia platyloba	79	O55	Notodontidae	Dasylophia eminens	1
aug	2	mulching	Cordia alliodora	95	O375	Nymphalidae	Memphis pithyusa	2
aug	2	mulching	Cordia alliodora	95	O375	Nymphalidae	Memphis pithyusa	2
dec	1	control	Caesalpinia pulcherrima	92	O14	Oecophoridae	Oecophoridae sp1	1
dec	1	mulching	Guazuma ulmifolia	63	O14	Oecophoridae	Oecophoridae sp1	1
dec	3	mulching	Lysiloma microphyllum	32	O14	Oecophoridae	Oecophoridae sp1	1
aug	3	weeding	Caesalpinia platyloba	31	O14	Oecophoridae	Oecophoridae sp1	1
aug	1	weeding	Lysiloma microphyllum	119	O179	Psychidae	Psychidae sp2	1
aug	2	mulching	Guazuma ulmifolia	63	O3	Psychidae	Psychidae sp1	1
aug	1	weeding	Caesalpinia platyloba	79	O3	Psychidae	Psychidae sp1	1
aug	3	weeding	Caesalpinia pulcherrima	83	O3	Psychidae	Psychidae sp1	1
aug	1	control	Apoplanesia paniculada	112	O3	Psychidae	Psychidae sp1	1
sep	3	mulching	Gliricidia sepium	117	O3	Psychidae	Psychidae sp1	1
nov	2	weeding	Apoplanesia paniculada	112	O3	Psychidae	Psychidae sp1	1
nov	2	mulching	Guazuma ulmifolia	93	O3	Psychidae	Psychidae sp1	1
nov	1	mulching	Gliricidia sepium	108	O3	Psychidae	Psychidae sp1	1
nov	3	mulching	Gliricidia sepium	108	O3	Psychidae	Psychidae sp1	1
nov	3	control	Cordia alliodora	74	O3	Psychidae	Psychidae sp1	1
nov	1	mulching	Cordia elaeagnoides	91	O3	Psychidae	Psychidae sp1	1
nov	2	mulching	Cordia elaeagnoides	100	O3	Psychidae	Psychidae sp1	1
nov	2	control	Cordia elaeagnoides	109	O3	Psychidae	Psychidae sp1	2
nov	1	mulching	Lysiloma microphyllum	41	O3	Psychidae	Psychidae sp1	1
nov	1	mulching	Guazuma ulmifolia	45	O3	Psychidae	Psychidae sp1	1
dec	2	mulching	Cordia elaeagnoides	100	O3	Psychidae	Psychidae sp1	1
dec	1	weeding	Guazuma ulmifolia	102	O3	Psychidae	Psychidae sp1	1
dec	3	mulching	Cordia elaeagnoides	91	O3	Psychidae	Psychidae sp1	1
aug	2	mulching	Cordia elaeagnoides	34	O236	Pterophoridae	Hellensia chamelai	1
sep	3	mulching	Cordia elaeagnoides	34	O236	Pterophoridae	Hellensia chamelai	1
sep	3	control	Cordia elaeagnoides		O236	Pterophoridae	Hellensia chamelai	1
sep	3	control	Cordia elaeagnoides	91	O236	Pterophoridae	Hellensia chamelai	1
sep	3	control	Cordia elaeagnoides	4	O236	Pterophoridae	Hellensia chamelai	1
oct	3	mulching	Cordia elaeagnoides	34	O236	Pterophoridae	Hellensia chamelai	1
oct	3	mulching	Cordia elaeagnoides	109	O236	Pterophoridae	Hellensia chamelai	1
dec	2	weeding	Heliocarpus pallidus	85	O236	Pterophoridae	Hellensia chamelai	3
nov	2	control	Apoplanesia paniculada	112	O173	Pyralidae	Pococera sp.	1
nov	2	mulching	Caesalpinia pulcherrima	53	O91	Pyralidae	Pyralidae sp1	1
nov	2	weeding	Guazuma ulmifolia	102	O91	Pyralidae	Pyralidae sp1	1
oct	2	mulching	Caesalpinia platyloba	70	O111	Riodinidae	Emesis emesia	1
dec	3	control	Caesalpinia platyloba	31	O111	Riodinidae	Emesis emesia	1
aug	1	mulching	Cordia elaeagnoides	82	O473	Saturniidae	Automeris iio	2
dec	2	weeding	Leucaena leucocephala	75	O158	Tortricidae	Tortricidae sp1	1
dec	3	mulching	Heliocarpus pallidus	76	O361	Tortricidae	Tortricidae sp1	1
dec	1	control	Gliricidia sepium	69	O427	Tortricidae	Tortricidae sp1	1
dec	3	control	Heliocarpus pallidus	10	E6	unknown		1
dec	2	control	Apoplanesia paniculada	112	E7	unknown		1
oct	2	mulching	Caesalpinia platyloba	70	G3	unknown		1
oct	2	mulching	Caesalpinia platyloba	70	G4	unknown		1
nov	3	weeding	Leucaena leucocephala	27	J1	unknown		1
oct	2	weeding	Gliricidia sepium	78	J2	unknown		1
nov	3	weeding	Caesalpinia eriostachys	3	J2	unknown		1
nov	3	weeding	Gliricidia sepium	21	J3	unknown		1
nov	3	weeding	Gliricidia sepium	21	J4	unknown		1
oct	2	control	Caesalpinia platyloba	88	J8	unknown		1
nov	3	mulching	Gliricidia sepium	108	L1	unknown		1
nov	3	mulching	Gliricidia sepium	87	L2	unknown		1
nov	2	weeding	Guazuma ulmifolia	111	M1	unknown		1
nov	2	weeding	Gliricidia sepium	117	M1	unknown		1
nov	2	weeding	Gliricidia sepium	39	M1	unknown		1
nov	3	control	Caesalpinia eriostachys	42	M1	unknown		1
dec	2	weeding	Apoplanesia paniculada	64	M1	unknown		1
dec	3	weeding	Leucaena leucocephala	9	M1	unknown		1
aug	1	weeding	Lysiloma microphyllum	98	M11	unknown		1
nov	2	mulching	Guazuma ulmifolia	63	M11	unknown		2
nov	2	mulching	Heliocarpus pallidus	76	M12	unknown		1
sep	1	control	Apoplanesia paniculada	112	M13	unknown		1
sep	1	control	Lysiloma microphyllum	98	M14	unknown		1
sep	1	control	Cordia elaeagnoides	91	M15	unknown		1
aug	3	weeding	Cordia alliodora	8	M17	unknown		1
aug	2	weeding	Cordia elaeagnoides	109	M2	unknown		2
nov	2	weeding	Caesalpinia platyloba	97	M2	unknown		1
nov	2	weeding	Gliricidia sepium	117	M2	unknown		1
nov	3	control	Caesalpinia eriostachys	42	M2	unknown		1
dec	3	control	Leucaena leucocephala	48	M2	unknown		1
dec	2	mulching	Caesalpinia platyloba	118	M2 (NUEVA)	unknown		1
nov	2	weeding	Caesalpinia platyloba	97	M3	unknown		1
nov	2	weeding	Caesalpinia platyloba	118	M3	unknown		1
nov	3	mulching	Guazuma ulmifolia	36	M3	unknown		3
aug	2	weeding	Heliocarpus pallidus	106	M4	unknown		1
nov	3	mulching	Leucaena leucocephala	18	M4	unknown		1
nov	2	control	Caesalpinia platyloba	88	M5	unknown		1
aug	2	weeding	Gliricidia sepium	87	M5	unknown		1
aug	2	weeding	Guazuma ulmifolia	93	M6	unknown		1
nov	2	control	Caesalpinia platyloba	88	M6	unknown		1
sep	3	control	Heliocarpus pallidus	37	M7	unknown		1
nov	2	control	Apoplanesia paniculada	73	M7	unknown		1
sep	3	control	Cordia elaeagnoides	43	M8	unknown		1
aug	1	weeding	Apoplanesia paniculada	112	M9	unknown		1
sep	1	control	Guazuma ulmifolia	84	M9	unknown		3
nov	2	weeding	Gliricidia sepium	78	N1	unknown		1
oct	3	weeding	Gliricidia sepium	12	O426	unknown		1
dec	1	control	Caesalpinia platyloba	88	O463	unknown		1
dec	3	control	Guazuma ulmifolia	15	O479	unknown		1
aug	2	mulching	Gliricidia sepium	39	O510	unknown		1
aug	2	mulching	Gliricidia sepium	117	O510	unknown		3
aug	2	weeding	Gliricidia sepium	117	O510	unknown		1
aug	2	weeding	Gliricidia sepium	39	O510	unknown		1
sep	3	mulching	Gliricidia sepium	117	O510	unknown		1
oct	2	weeding	Gliricidia sepium	87	O510	unknown		1
sep	3	mulching	Heliocarpus pallidus	106	O512	unknown		1
aug	2	mulching	Heliocarpus pallidus	115	O568	unknown		3
aug	2	mulching	Gliricidia sepium	117	O568	unknown		3
aug	1	mulching	Heliocarpus pallidus	67	O568	unknown		1
sep	3	control	Gliricidia sepium	42	O598	unknown		1
sep	1	weeding	Gliricidia sepium	39	O598	unknown		1
oct	1	control	Gliricidia sepium	69	O598	unknown		1
sep	3	mulching	Cordia elaeagnoides	43	O599	unknown		1
oct	3	control	Cordia elaeagnoides	4	O599	unknown		1
dec	2	weeding	Gliricidia sepium	39	O608	unknown		1
oct	1	mulching	Gliricidia sepium	69	P1	unknown		1
dec	2	control	Gliricidia sepium	117	P2	unknown		1
dec	1	control	Leucaena leucocephala	96	R1	unknown		1
nov	1	control	Guazuma ulmifolia	111	R2	unknown		1
oct	2	weeding	Caesalpinia platyloba	97	O24	Urodidae	Wockia chewbacca	1

## Sheet: % predation
date	site	treatment	plant species	disapeared green	disapeared brown	predated green	predated brown
july	1	control	Cordia elaeagnoides	0	0	0.33	0
july	1	control	Gliricidia sepium	0	0.16	0.495	0.25
july	1	control	Caesalpinia platyloba	0	0	0	0.33
july	1	control	Guazuma ulmifolia	0	0	0	0.165
july	1	control	Lysiloma microphyllum	0.16	0	0.58	0
july	1	control	Apoplanesia paniculada	0.33	0.16	0	0
july	1	control	Heliocarpus pallidus	0	0	0.33	0.165
july	1	control	Caesalpinia pulcherrima	0	0.16	0.495	0.33
july	1	mulching	Cordia elaeagnoides	0	0	0.165	0.165
july	1	mulching	Gliricidia sepium	0	0	0	0.165
july	1	mulching	Caesalpinia platyloba	0.16	0.16	0	0
july	1	mulching	Guazuma ulmifolia	0	0	0	0.165
july	1	mulching	Lysiloma microphyllum	0.16	0	0.58	0.33
july	1	mulching	Apoplanesia paniculada	0.16	0.16	0	0
july	1	mulching	Heliocarpus pallidus	0	0	0	0.33
july	1	mulching	Caesalpinia pulcherrima	0	0	0	0
july	2	control	Cordia elaeagnoides	0.1	0	0	0
july	2	control	Gliricidia sepium	0	0.1	0	0
july	2	control	Caesalpinia platyloba	0	0.2	0	0
july	2	control	Guazuma ulmifolia	0	0	0.2	0
july	2	control	Lysiloma microphyllum	0	0	0.1	0
july	2	control	Apoplanesia paniculada	0	0	0	0
july	2	control	Heliocarpus pallidus	0	0.2	0.4	0
july	2	control	Caesalpinia pulcherrima	0	0	0	0
july	2	control	Caesalpinia eriostachys	0	0	0.2	0
july	2	mulching	Cordia elaeagnoides	0	0.125	0	0
july	2	mulching	Gliricidia sepium	0	0.125	0.125	0.125
july	2	mulching	Caesalpinia platyloba	0.1	0.4	0	0
july	2	mulching	Guazuma ulmifolia	0	0	0	0
july	2	mulching	Lysiloma microphyllum	0	0.1	0	0.2
july	2	mulching	Apoplanesia paniculada	0	0	0.2	0.2
july	2	mulching	Heliocarpus pallidus	0	0	0	0
july	2	mulching	Caesalpinia pulcherrima	0.1	0.3	0	0
july	2	mulching	Caesalpinia eriostachys	0.2	0.1	0	0
August	1	control	Cordia elaeagnoides	0	0	0.6	0.9
August	1	control	Gliricidia sepium	0.1	0	0.525	0.2
August	1	control	Caesalpinia platyloba	0.1	0.1	0.725	0.6
August	1	control	Guazuma ulmifolia	0	0	0.3	0.2
August	1	control	Lysiloma microphyllum	0	0	0.6	0.3
August	1	control	Apoplanesia paniculada	0	0.2	0.6	0.4
August	1	control	Heliocarpus pallidus	0	0	0.5	0.2
August	1	control	Caesalpinia pulcherrima	0	0	0.6	0.5
August	1	control	Caesalpinia eriostachys	0	0	1	0
August	1	mulching	Cordia elaeagnoides	0.1	0	0.65	0.4
August	1	mulching	Gliricidia sepium	0	0	0.8	0.2
August	1	mulching	Caesalpinia platyloba	0.2	0.2	0.965	0.2
August	1	mulching	Guazuma ulmifolia	0.1	0.1	0.85	0.5
August	1	mulching	Lysiloma microphyllum	0	0.1	0.5	0.525
August	1	mulching	Apoplanesia paniculada	0	0.1	0.6	0
August	1	mulching	Heliocarpus pallidus	0	0.3	0.3	0.665
August	1	mulching	Caesalpinia pulcherrima	0.1	0.1	0.65	0.4
August	1	mulching	Caesalpinia eriostachys	0.1	0.2	1.05	0.965
August	2	control	Cordia elaeagnoides	0.1	0	0.325	0
August	2	control	Gliricidia sepium	0	0.1	0	0
August	2	control	Caesalpinia platyloba	0.2	0.3	0	0
August	2	control	Guazuma ulmifolia	0	0	0.2	0.3
August	2	control	Lysiloma microphyllum	0	0	0.1	0.1
August	2	control	Apoplanesia paniculada	0	0.2	0	0.4
August	2	control	Heliocarpus pallidus	0	0	0.1	0.5
August	2	control	Caesalpinia pulcherrima	0	0.2	0.3	0.4
August	2	control	Caesalpinia eriostachys	0	0.1	0.3	0.2
August	2	mulching	Cordia elaeagnoides	0.1	0.1	0	0.125
August	2	mulching	Gliricidia sepium	0.2	0.3	0	0.5
August	2	mulching	Caesalpinia platyloba	0.2	0.1	0	0.2
August	2	mulching	Guazuma ulmifolia	0.1	0.1	0.4	0.2
August	2	mulching	Lysiloma microphyllum	0.2	0.2	0.625	0
August	2	mulching	Apoplanesia paniculada	0.2	0.1	0	0
August	2	mulching	Heliocarpus pallidus	0	0.1	0.2	0
August	2	mulching	Caesalpinia pulcherrima	0	0	0.2	0.1
August	2	mulching	Caesalpinia eriostachys	0	0.4	0	0.2
September	1	control	Cordia elaeagnoides	0.1	0	0.725	0
September	1	control	Gliricidia sepium	0	0.3	0.4	0.2
September	1	control	Caesalpinia platyloba	0	0.2	0.2	0.365
September	1	control	Guazuma ulmifolia	0	0.1	0.4	0
September	1	control	Lysiloma microphyllum	0	0	0	0.1
September	1	control	Apoplanesia paniculada	0	0.2	0.7	0
September	1	control	Heliocarpus pallidus	0	0	0.2	0.3
September	1	control	Caesalpinia pulcherrima	0.3	0	0.165	0
September	1	control	Caesalpinia eriostachys	0.2	0.2	0	0.25
September	1	mulching	Cordia elaeagnoides	0.1	0.1	0.4	0.325
September	1	mulching	Gliricidia sepium	0	0.2	0.3	0
September	1	mulching	Caesalpinia platyloba	0.2	0.2	0.125	0
September	1	mulching	Guazuma ulmifolia	0	0.1	0	0.2
September	1	mulching	Lysiloma microphyllum	0.2	0.4	0	0.25
September	1	mulching	Apoplanesia paniculada	0.2	0.3	0.365	0.25
September	1	mulching	Heliocarpus pallidus	0	0.1	0	0.125
September	1	mulching	Caesalpinia pulcherrima	0.2	0.3	0	0.25
September	1	mulching	Caesalpinia eriostachys	0.2	0.4	0	0
September	2	control	Cordia elaeagnoides	0	0	0.4	1.1
September	2	control	Gliricidia sepium	0.4	0.5	0.25	0.25
September	2	control	Caesalpinia platyloba	0	0.4	0.3	0.5
September	2	control	Guazuma ulmifolia	0.3	0.3	0.165	0.25
September	2	control	Lysiloma microphyllum	0	0.4	0.4	0.165
September	2	control	Apoplanesia paniculada	0.3	0.4	0.91	0.495
September	2	control	Heliocarpus pallidus	0	0.2	0.6	0.625
September	2	control	Caesalpinia pulcherrima	0.1	0	0.6	0.2
September	2	control	Caesalpinia eriostachys	0.3	0.5	0.2	0.25
September	2	mulching	Cordia elaeagnoides	0.1	0	0.725	0.5
September	2	mulching	Gliricidia sepium	0.3	0.4	0	0.25
September	2	mulching	Caesalpinia platyloba	0.1	0.2	0.45	0.365
September	2	mulching	Guazuma ulmifolia	0	0.25	0.5	0.33
September	2	mulching	Lysiloma microphyllum	0.3	0.5	0.665	0.25
September	2	mulching	Apoplanesia paniculada	0.1	0.1	0.725	0.525
September	2	mulching	Heliocarpus pallidus	0	0.1	0.7	0.2
September	2	mulching	Caesalpinia pulcherrima	0.1	0.2	0	0
September	2	mulching	Caesalpinia eriostachys	0.3	0.2	0.5	0.25
October	1	control	Cordia elaeagnoides	0	0	0.5	0.5
October	1	control	Gliricidia sepium	0	0.1	0.4	0.2
October	1	control	Caesalpinia platyloba	0	0	0.5	0.6
October	1	control	Guazuma ulmifolia	0	0	0.5	0.6
October	1	control	Lysiloma microphyllum	0	0.1	0.2	0.25
October	1	control	Apoplanesia paniculada	0.1	0.1	0.5	0.725
October	1	control	Heliocarpus pallidus	0	0.2	0.7	0.125
October	1	control	Caesalpinia pulcherrima	0	0.1	0.4	0
October	1	control	Caesalpinia eriostachys	0	0	0	0.875
October	1	mulching	Cordia elaeagnoides	0	0.1	0.5	0
October	1	mulching	Gliricidia sepium	0	0.2	0	0.25
October	1	mulching	Caesalpinia platyloba	0	0.1	0	0
October	1	mulching	Guazuma ulmifolia	0.1	0	0.5	0.5
October	1	mulching	Lysiloma microphyllum	0	0.1	0	0.125
October	1	mulching	Apoplanesia paniculada	0	0.1	0	0.2
October	1	mulching	Heliocarpus pallidus	0	0.2	0.7	0
October	1	mulching	Caesalpinia pulcherrima	0.1	0	0.2	0.7
October	1	mulching	Caesalpinia eriostachys	0	0.1	0.4	0.2

[truncated: 1 more sheets: predator type]
